# Supplementary material
Source: publisher figshare collection journal article supplement (https://acs.figshare.com/ndownloader/files/5068342)
Supplement: Supplementary file 1 [file 5068342]

# Heparan Sulfate Degradation via Reductive Homolysis of its *N*-Chloro Derivatives

*Martin D. Rees, and Michael J. Davies\**

145-147 Missenden Rd Camperdown, Sydney NSW 2050 Australia

[\\*daviesm@hri.org.au](mailto:*daviesm@hri.org.au)

**SUPPLEMENTARY DATA**

| <i>N</i> -Chloro derivative                             | Hyperfine splitting (mT) <sup>1</sup> |                   |                         | Assigned structure of trapped radical       |
|---------------------------------------------------------|---------------------------------------|-------------------|-------------------------|---------------------------------------------|
|                                                         | <i>a</i> (N, NO)                      | <i>a</i> (H)      | <i>a</i> (other)        |                                             |
| [2- <sup>13</sup> C]-GlcNH <sub>2</sub><br>chloramine   | 1.55                                  | 2.50              | 0.66 ( <sup>13</sup> C) | C-2 carbon-centered radical (adduct isomer) |
|                                                         | 1.56                                  | 2.34              | 0.67 ( <sup>13</sup> C) | C-2 carbon-centered radical (adduct isomer) |
|                                                         | 1.53                                  | 2.28              | 0.80 ( <sup>13</sup> C) | C-2 carbon-centered radical (adduct isomer) |
| [2- <sup>13</sup> C]-GlcNH <sub>2</sub><br>dichloramine | 1.48                                  | 1.83              | 0.34 (N)                | <i>N</i> -chloroaminy radical (•NCl-R)      |
| GlcNSO <sub>3</sub><br><i>N</i> -chlorosulfonamide      | 1.61                                  | 2.32              | -                       | C-2 carbon-centered radical (adduct isomer) |
|                                                         | 1.61                                  | 2.14              | -                       | C-2 carbon-centered radical (adduct isomer) |
| Polymer-derived<br>chloramines                          | 1.57 <sup>2</sup>                     | 2.34 <sup>2</sup> | -                       | carbon-centered radical                     |
|                                                         | 1.57                                  | 1.86              | -                       | CO <sub>2</sub> • <sup>-</sup>              |
| Polymer-derived<br>dichloramines                        | -                                     | -                 | -                       | no substrate-derived adducts detected       |
| Polymer-derived<br><i>N</i> -chlorosulfonamides         | 1.50 <sup>2</sup>                     | 2.70 <sup>2</sup> | -                       | carbon-centered radical                     |
|                                                         | 2.10 <sup>2</sup>                     | 1.70 <sup>2</sup> | -                       | unidentified                                |
|                                                         | 7.0 <sup>2</sup> (total width)        |                   |                         | unidentified                                |
|                                                         | 1.57                                  | 1.86              | -                       | CO <sub>2</sub> • <sup>-</sup>              |

<sup>1</sup>Hyperfine coupling constants ± 0.01 mT

<sup>2</sup> Approximate value due to broad nature of spectral lines

**Table 1.** Substrate-derived DMPO adducts detected by EPR spectroscopy upon decomposition of monosaccharide and polymer *N*-chloro derivatives in the presence of DMPO.

| <i>N</i> -Chloro derivative                                                                                                                                                     | Hyperfine splitting (mT) <sup>1</sup> |              |                  | Assigned structure of trapped radical       |
|---------------------------------------------------------------------------------------------------------------------------------------------------------------------------------|---------------------------------------|--------------|------------------|---------------------------------------------|
|                                                                                                                                                                                 | <i>a</i> (N, NO)                      | <i>a</i> (H) | <i>a</i> (other) |                                             |
| GlcNH <sub>2</sub> chloramine,<br>polymer-derived<br>GlcNH <sub>2</sub> chloramines,<br>GlcNH <sub>2</sub> dichloramine,<br>polymer-derived<br>GlcNH <sub>2</sub> dichloramines | -                                     | -            | -                | no substrate-derived adducts detected       |
| GlcNSO <sub>3</sub><br><i>N</i> -chlorosulfonamide                                                                                                                              | 1.52                                  | 0.05         | 0.18 (N)         | C-2 carbon-centered radical (adduct isomer) |
|                                                                                                                                                                                 | 1.53                                  | -            | 0.18 (N)         | C-2 carbon-centered radical (adduct isomer) |
|                                                                                                                                                                                 | 1.50                                  | 0.08         | 0.22 (N)         | C-2 carbon-centered radical (adduct isomer) |
|                                                                                                                                                                                 | 1.47                                  | -            | -                | SO <sub>3</sub> <sup>•-</sup>               |
| Polymer-derived<br>GlcNSO <sub>3</sub><br><i>N</i> -chlorosulfonamides                                                                                                          | 1.50 <sup>2</sup>                     |              |                  | carbon-centered radical                     |
|                                                                                                                                                                                 | >1.50 <sup>2,3</sup>                  | -            | -                | carbon-centered radical                     |
|                                                                                                                                                                                 | 1.47                                  | -            | -                | SO <sub>3</sub> <sup>•-</sup>               |

<sup>1</sup> Hyperfine coupling constants  $\pm 0.01$  mT.

<sup>2</sup> Approximate value due to broad nature of spectral lines

<sup>3</sup> Tentative assignment, see text

**Table 2.** Substrate-derived MNP adducts detected by EPR spectroscopy upon decomposition of monosaccharide and polymer *N*-chloro derivatives in the presence of MNP.

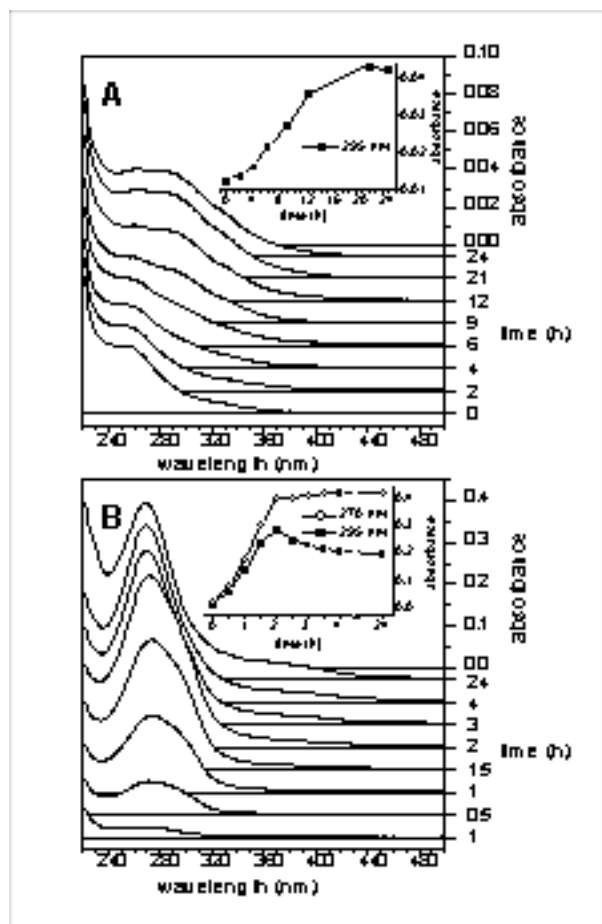

**Figure 6.** Formation of chromophores upon decomposition of polymer *N*-chloro derivatives. UV-vis absorbance spectra of samples were obtained after 10-fold dilution in phosphate buffer. (A) dnsp-HP chloramines (406  $\mu\text{M}$ ) +  $\text{Cu}^{2+}$  (10  $\mu\text{M}$ ), 37°C, aerobic conditions; *inset* – absorbance values at 295 nm. (B) p-HP NCl (2.01 mM) +  $\text{Cu}^{2+}$  (10  $\mu\text{M}$ ), 37°C, aerobic conditions; *inset* – absorbance values at 270 and 295 nm.
